# Supplementary material for: Acarbose Treatment and the Risk of Cardiovascular Disease in Type 2 Diabetic Patients: A Nationwide Seven-Year Follow-Up Study
Source: J Diabetes Res. 2014 Jul 7;2014:812628. doi: 10.1155/2014/812628 (PMC4147291; doi:10.1155/2014/812628)
Supplement: Supplementary file 1 — 1, Demographics, Disease and Treatment Characteristics of those treated with or without Acarbose; 2, flow chart of the sub-study about recurrence of cardiovascular disease. [file 812628.f1.zip]

Archive with 2 entries (2 files):
- 979320.docx
- 979316.doc
